# Supplementary material
Source: Frontiers journal article supplement (https://www.frontiersin.org/articles/17686)
Supplement: Data_Sheet_2.PDF [file Data_Sheet_2.PDF]

'This script is written in Spike2 language (CED, Cambridge, UK). It calculates the muscle transfer function and creates the values for current injection into the model AGR.

'This script is based on Chuck Geier's thesis (Scott Hooper's laboratory at Ohio University) <http://crab-lab.zool.ohiou.edu/hooper/> and was initially created by Ralph DiCaprio (Dec 2002) and modified by Dirk Bucher (Dec 2002).

'It creates a muscle tension output from a spike event channel using a te-at function. Initially used for the p1 muscle in *Panulirus interruptus*

'assign:

' - number of sequential filters should normally be 3.  
' - time constant of the filters is used for all of them  
' - time steps sets the "sampling" interval of the output. this is automatically converted to the nearest multiple of the file time resolution.  
' - % of maximum y range maximum y range is 5V.  
This sets the amplitude of the response to a single event. this is important  
' because if the whole channel was scaled, different files would always have different kernel amplitudes.  
' - scaling factor this scales the output with a factor that was derived in our experiments and adapts the output values for use as current injection in the AGR model

'There is no threshold filter built in (see Chuck's thesis).

'-----  
-----

'This script needs a data file with an event channel containing the times of motor neuron spikes. In our case the GM neurons

'The output is then scaled with a scaling factor (default = 1.1282) that was determined in our experiments

'initialize windows etc

if ViewKind() <> 0 then 'checks if the associated window is a time view...

    Message("This isn't a time view!"); 'if there is no data file  
    FrontView (App (3)); 'brings script to front...  
    Halt; 'and stops it

endif

WindowVisible (3); 'sets the time view to the front

'define variables

var ok%, cur1, cur2, wholefile%;

if Cursor (2)<Cursor (1) or Cursor (1)=-1 or Cursor (2)=-1 then ' if Cursor (1) and Cursor (2) are not present or not in the right order....

    DlgCreate("ATTENTION!");  
    DlgText("Cursor (1) and (2) not set correctly.",2,1);

```

DlgLabel(1, "Analyse whole file?",2,2);
    '...choose if you want to analyse the whole file
ok%:=DlgShow (wholefile%);

if ok%=1 then
    'sets analysis to whole file or...
    cur1:= 0;

    cur2:=MaxTime ();
else
    interact("get Cursors 1 and 2 and select time range for analysis",1023);
    cur1 := Cursor(1);
    'get cursor times
    cur2 := Cursor(2);

endif

else
    cur1 := Cursor(1);
    'if present and in the right order, get cursor times

    cur2 := Cursor(2);
endif

'define more variable
var name$;
var scale;
var i%,tstep;
var nspks%,spktime[100000];
var mch%;
var mintau;
var tausteps;
var maxtau;
var x;
var ok1%,tau,spkch%,outch%,pexp%, points%, scalingfactor;

'start dialog for kernal time input
DlgCreate ("Muscle transform Filter");
DlgChan (1, "Import channel:",2);
DlgChan (2, "New channel #:",128);
DlgString (3, "New channel name:",15);
DlgInteger (4,"# of sequential filters:",1,3);
DlgReal (5,"time constant (ms):",0.0,3000);
DlgReal (6,"Time steps [ms]:",0.0000,2000);
DlgReal (7,"% of maximum y range:",0,100);
DlgReal (8,"Scaling factor for output values",0,100);
name$="muscle";

'dialog presets
scale:=1;

```

```

tau:=320;
pexp%:=3;
tstep:=1;

mintau:=10;
tausteps:=10;
maxtau:=3000;
scalingfactor:=1.1282; 'this is used to scale the output for use in the AGR model (as
determined in our experiments).
ok1%:=DlgShow(spkch%,outch%,name$,pexp%,tau,tstep,scale, scalingfactor); 'assign
variables

```

```

    if ok1%<>1 then      'if Cancel was clicked
FrontView (App (3));    'brings script to front...
HALT;                  '...and stops it
endif

```

```

var sinc[100000];
pexp%:=pexp%-1;          'converts # of filters to exponential
tstep:=tstep/1000.0;      'converts time step to seconds

```

```

var interv,tfactor%;

```

```

interv:=Binsize();        'reads the file time resolution
tfactor%:= tstep/interv;  'gets nearest multiple of file time interval
if tfactor%=0 then        'resolution can't exceed file time resolution!
    tstep:=interv;
else
    tstep:=tfactor%*interv; 'sets time step to nearest multiple of file time interval
endif

```

```

var endbin%;
endbin%:= cur2/tstep;      'gets bin # of analysis window end
var startbin%;
startbin%:=cur1/tstep;     'gets bin # of analysis window start

```

```

var tauscale;              'scales the number of points used for the kernel array so
that
if pexp%=0 then            'the function just declines to zero
    tauscale:=0.007;
else
    if pexp%=1 then
        tauscale:=0.01;
    else
        tauscale:=0.012;
    endif
endif
points%:=(tauscale*tau)/tstep;

```

```

var muscleout[10000000];

for i% := 0 to points%-1 step 1 do
    'Build muscle impulse response
    sinc[i%]:=Pow(i%*tstep,pexp%)*Exp((-i%*tstep)/(tau/1000.0));
next;

var amp,imax%;
function to maximum value of single event response
imax%:=Max(sinc[:points%-1]);
amp:=sinc[imax%];
ArrDiv(sinc[:points%-1],amp);
ArrMul(sinc[:points%-1],scale/20);

nspks%:=ChanData(spkich%,spktime[],cur1,cur2); 'get spike times

var ind%, k%;

mch%:=MemChan(1,0,tstep);
channel
'create waveform buffer

for k% :=0 to nspks%-1 step 1 do
    ind%:=spktime[k%]/tstep;
    ArrAdd(muscleout[ind%:ind%+(points%-1)],sinc[:points%-1]);
array
next;
'loop through spike times
'get bin # of spike (index # in array)
'add function to

ARRmul(muscleout[],scalingfactor);
'multiplies the output by the scalingfactor

MemSetItem(mch%,0,cur1+tstep,muscleout[startbin%:endbin%-startbin%]); 'import array
into waveform channel

MemSave(mch%,outch%, 0, 0);
ChanDelete(mch%, 0);
ChanShow(outch%);
ChanTitle$(outch%,name$);
Optimise(outch%);
'saves buffer channel to a real channel
'deletes the buffer channel
'shows new channel
'names new channel
'optimise y-axis

message("Channel number ",outch%," contains the muscle output");

var xval[100000], xy%, j%;

for j% := 0 to points%-1 step 1 do
    xval[j%]:=j%*tstep;
values
next;
'loop through kernel points
'fill array with time

```
